# Supplementary material for: Reaction of cyclotrisilene with phenylacetylene: an unusual product with a bicyclo[3.2.0]hepta-3,6-diene skeleton
Source: Royal Society of Chemistry journal article supplement (doi:10.1039/b008375p), 2001-01-01
Supplement: b008375p.doc [file b008375p.doc]

**Supplementary Information**

**Experimental Procedure, Spectral Data, and X-ray Data of the Products**

**Synthesis of 1,2,2,5-tetrakis[di-tert-butyl(methyl)silyl]-4,7-diphenyl-1,2,5-trisilabicyclo[3.2.0]hepta-3,6-diene (2).**

The red-orange crystals of 1 (36 mg, 0.05 mmol) were placed in a reaction vessel with a magnetic stirrer. Degassed phenyl-acetylene (0.15 mL, 1.59 mmol) was introduced by vacuum transfer, and the mixture was stirred for 15 h at room temperature. The solvent and excess phenylacetylene were removed in vacuo, the resulting residue being separated by a gel permeation chromatography to give 2 (30 mg, 65%) as colorless crystals; mp 168 °C (dec); MS (EI, 70 eV) m/e (%) 916 (M+, 0.5), 859 (1.1), 759 (25), 158 (11), 73 (100); dH (300 MHz, C6D6) 0.15 (s, 3 H), 0.31 (s, 3 H), 0.50 (s, 3 H), 0.67 (s, 3 H), 0.89 (s, 9 H), 0.96 (s, 9 H), 1.05 (s, 9 H), 1.13 (s, 9 H), 1.14 (s, 9 H), 1.278 (s, 9 H), 1.282 (s, 9 H), 1.38 (s, 9 H), 7.02—7.08 (m, 2 H), 7.22—7.24 (m, 4 H), 7.42 (s, 1 H), 7.51—7.54 (m, 2 H), 7.72—7.75 (m, 2 H), 7.98 (s, 1 H); dC (75.5 MHz, C6D6) -3.5, -1.7, -1.2, -0.6, 21.7, 22.1, 22.4, 22.6, 22.7, 23.6, 23.71, 23.74, 30.0 (2C), 30.4, 31.3, 31.7 (2C), 31.86, 31.94, 126.4, 126.9, 127.8, 128.1, 128.5, 128.7, 142.2, 150.4, 153.2, 155.7, 162.4, 167.4; dSi (59.6 MHz, C6D6) -54.8, -23.9, -21.1, 9.6, 16.4, 19.7, 21.7; Anal. Calcd for C52H96Si7: C, 68.04; H, 10.54. Found: C, 68.34; H, 10.21.

**X-ray crystallography of 1,2,2,5-tetrakis[di-tert-butyl-(methyl)silyl]-4,7-diphenyl-1,2,5-trisilabicyclo[3.2.0]hepta-3,6-diene (2).**

A single crystal of 2 for X-ray diffraction was grown from a hexane/toluene solution. Diffraction data were collected at 150 K on a Mac Science DIP2030 Image Plate Diffractometer with a rotating anode (50 kV, 90 mA) employing graphite-monochromatized Mo–Ka radiation (l = 0.71070 Å). The structure was solved by the direct method and refined by the full-matrix least-squares method using SHELXL-97 program. Crystal data for 2: C52H96Si7, M= 917.92, triclinic, a = 13.7380(8), b = 14.6250(9), c = 15.751(1) Å, a = 99.765(3), b = 114.847(3)°, g = 92.241(3)°, V = 2808.5(3) Å3, space group = P1, Z = 2, rcalcd = 1.085 gcm–3. The final R factor was 0.0705 (Rw = 0.2015 for all data) for 12169 reflections with I > 2s(I). GOF = 1.014.
